# Supplementary material for: β-Cyclodextrin: a supramolecular catalyst for metal-free approach towards the synthesis of 2-amino-4,6-diphenylnicotinonitriles and 2,3-dihydroquinazolin-4(1H)-one
Source: Royal Society of Chemistry journal article supplement (doi:10.1039/d0ra09562a), 2021-01-01
Supplement: d0ra09562a1.pdf [file d0ra09562a1.pdf]

## Supporting Information

### **$\beta$ -Cyclodextrin: A supramolecular catalyst for metal-free approach towards the synthesis of 2-amino-4,6-diphenylnicotinonitriles and 2,3-dihydroquinazolin-4(1*H*)-one**

Bijeta Mitra,<sup>a</sup> Gyan Chandra Pariyar<sup>b</sup> and Pranab Ghosh<sup>\*a</sup>

<sup>a</sup>Department of Chemistry, University of North Bengal, Dist. Darjeeling, West Bengal, India.

<sup>b</sup>Department of Food Technology, University of North Bengal, Dist. Darjeeling, West Bengal, India.

#### **Table of contents**

|       |                                                                                                                                    |    |
|-------|------------------------------------------------------------------------------------------------------------------------------------|----|
| I.    | General information                                                                                                                | 2  |
| II.   | General procedure for the synthesis of 2-amino-4,6-disubstituted nicotinonitriles                                                  | 2  |
| III.  | General procedure for the synthesis of 2,3-dihydroquinazolin-4(1 <i>H</i> )-one                                                    | 2  |
| IV.   | Characterization data of synthesized 2-amino-4,6-diphenylnicotinonitriles and 2,3-dihydroquinazolin-4(1 <i>H</i> )-one Derivatives | 3  |
| V.    | FT-IR spectra 2-amino-4,6-disubstituted nicotinonitriles                                                                           | 12 |
| VI.   | FT-IR spectra of 2,3-dihydro-2-(4-methoxyphenyl)quinazolin-4(1 <i>H</i> )-one                                                      | 12 |
| VII.  | FT-IR spectra of 2-hexyl-2,3-dihydroquinazolin-4(1 <i>H</i> )-one                                                                  | 13 |
| VIII. | Scanned copies of <sup>13</sup> C, <sup>1</sup> H and <sup>19</sup> F NMR spectra of the derivatives                               | 14 |
| IX.   | References                                                                                                                         | 25 |

## **I. General Information**

Melting point of the solid compounds was determined in concentrated H<sub>2</sub>SO<sub>4</sub> bath. <sup>1</sup>H NMR, <sup>13</sup>C NMR and <sup>19</sup>F NMR were recorded using 300 MHz, 400 MHz and 75 MHz, 100 MHz and 376 MHz respectively on Bruker AV 300 NMR spectrometer and Bruker AV 400 NMR spectrometer using TMS as internal standard. IR spectra were recorded on KBr disc in the range 4000-400 cm<sup>-1</sup> on Shimadzu FT-IR 8300 Spectrometer. Splitting patterns of protons were described as s (singlet), d (doublet), t (triplet), br (broad) and m (multiplet).

### **General procedure for the synthesis of 2-amino-4,6-disubstituted nicotinonitriles**

To a mixture of aromatic aldehydes (1 mmol), acetophenone (1 mmol), malononitrile (1 mmol) and ammonium acetate (1 mmol) in a round-bottom flask, β-Cyclodextrin (10 mol%) and water were added. The resulting mixture was stirred at 90 °C for 2h in open air. The reaction progress was monitored using TLC with a mixture of ethyl acetate and n-hexane as the eluent system. After completion of the reaction, the mixture was quenched to room temperature and was extracted with ethyl acetate twice (2×20 ml). Combined extracts were washed with distilled water, dried over anhydrous Na<sub>2</sub>SO<sub>4</sub> and concentrated. The crude product was purified by passing through a column packed with silica gel. The products obtained were known compounds and identified by melting point, FT-IR and <sup>1</sup>H, <sup>13</sup>C NMR spectroscopy.

### **General procedure for the synthesis of 2,3-dihydroquinazolin-4(1H)-ones**

Aldehydes (1 mmol), isatoic anhydride (1 mmol) and ammonium acetate (1 mmol) were added in a round-bottom flask and then β-Cyclodextrin (10 mol%) was added to the mixture. The resulting mixture was stirred at 90 °C for 1h in open air. The reaction progress was monitored using TLC with a mixture of ethyl acetate and n-hexane as the eluent system. After completion of the reaction, the mixture was quenched to room temperature and was extracted with ethyl acetate twice (2×20 ml). Combined extracts were washed with distilled water, dried over anhydrous Na<sub>2</sub>SO<sub>4</sub> and concentrated. The residue obtained was recrystallized using a mixture of petroleum ether and ethyl acetate and then filtered to afford the desired pure solid products. All the products were separated without column chromatography. The products obtained were known compounds and were identified by melting point, FT-IR and <sup>1</sup>H, <sup>13</sup>C NMR spectroscopy.

#### IV. Characterization data of synthesized 2-amino-4,6-diphenylnicotinonitriles and 2,3-dihydroquinazolin-4(1H)-one Derivatives

##### 1.2-Amino-4,6-diphenylpyridine-3-carbonitrile<sup>1</sup>

Pale yellow solid; M.P.: 210 °C;

<sup>1</sup>H NMR (300 MHz, DMSO-*d*<sub>6</sub>) δ (ppm): 5.48 (s, 2H), 6.98 (d, *J* = 7.8 Hz, 2H), 7.20 (s, 1H), 7.40-7.47 (m, 3H), 7.68-7.82 (m, 3H), 8.14-8.26 (m, 2H);

<sup>13</sup>C NMR (75 MHz, DMSO-*d*<sub>6</sub>) δ (ppm): 88.4, 110.0, 114.2, 117.8, 127.8, 129.4, 129.9, 130.3, 130.5, 138.1, 155.6, 158.8, 160.7, 161.9.

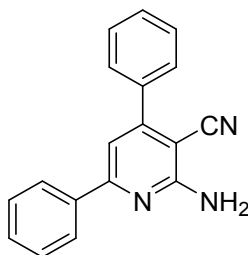

##### 2.2-Amino-4-(3-nitrophenyl)-6-phenylnicotinonitrile<sup>2</sup>

Dark brown solid; M.P.: 251-253 °C;

<sup>1</sup>H NMR (300 MHz, DMSO-*d*<sub>6</sub>) δ (ppm): 6.28 (s, 2H), 7.35 (s, 1H), 7.45-8.20 (m, 7H), 8.15 (d, *J* = 7.2 Hz, 1H), 8.42 (s, 1H);

<sup>13</sup>C NMR (75 MHz, DMSO-*d*<sub>6</sub>) δ (ppm): 85.8, 110.6, 116.9, 120.4, 128.6, 129.3, 130.6, 133.4, 136.7, 138.5, 148.0, 156.5, 158.9, 162.8.

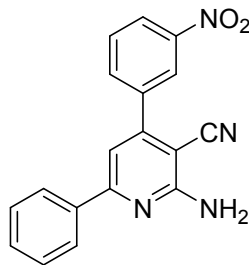

##### 3.2-Amino-4-(4-fluorophenyl)-6-phenylnicotinonitrile<sup>3</sup>

Yellow solid; M.P.: 148-150 °C;

<sup>1</sup>H NMR (300 MHz, DMSO-*d*<sub>6</sub>) δ (ppm): 6.88 (s, 2H), 7.19 (s, 1H), 7.41 (t, *J* = 7.8 Hz, 2H), 7.46-7.52 (m, 3H), 7.69-7.72 (m, 2H), 8.16-8.20 (m, 2H);

<sup>13</sup>C NMR (75 MHz, DMSO-*d*<sub>6</sub>) δ (ppm): 88.9, 109.2, 115.6, 117.9, 127.2, 128.6, 130.1, 130.9, 133.3, 138.7, 154.8, 163.8.

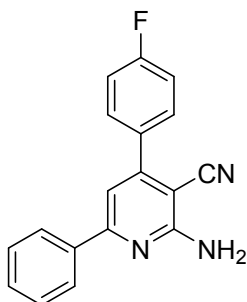

#### 4.2-Amino-4-(4-methoxyphenyl)-6-phenylnicotinonitrile<sup>1</sup>

Yellow solid; M.P.: 192-195 °C;

<sup>1</sup>H NMR (300 MHz, DMSO-*d*<sub>6</sub>) δ (ppm): 3.64 (s, 3H), 7.06 (d, *J* = 7.8 Hz, 2H), 7.20 (s, 1H), 7.42-7.68 (m, 3H), 7.65 (d, *J* = 7.8 Hz, 2H), 7.88 (d, *J* = 7.2 Hz, 2H);

<sup>13</sup>C NMR (75 MHz, DMSO-*d*<sub>6</sub>) δ (ppm): 55.6, 86.9, 109.5, 114.6, 117.8, 127.7, 129.1, 129.5, 130.3, 130.5, 138.1, 154.9, 158.9, 160.8, 161.4.

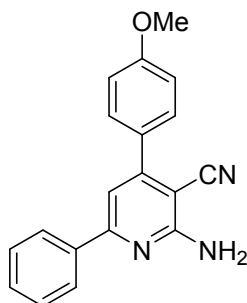

#### 5.2-Amino-4-(2-chlorophenyl)-6-phenylnicotinonitrile<sup>2</sup>

White solid; M.P.: 194-197 °C;

<sup>1</sup>H NMR (300 MHz, DMSO-*d*<sub>6</sub>) δ (ppm): 6.12 (s, 2H), 7.18 (s, 1H), 7.45-7.58 (m, 5H), 7.66 (d, *J* = 7.2 Hz, 2H), 8.21-8.34 (m, 2H);

<sup>13</sup>C NMR (75 MHz, DMSO-*d*<sub>6</sub>) δ (ppm): 88.4, 109.7, 116.1, 125.2, 127.5, 128.7, 129.7, 130.2, 130.9, 131.2, 136.6, 137.9, 153.0, 158.5, 160.1.

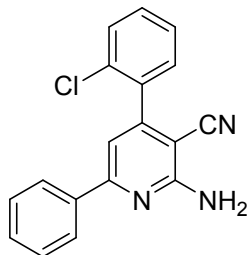

### 6.2-Amino-4-phenyl-6-(4-chlorophenyl)nicotinonitrile<sup>3</sup>

Yellow solid;

<sup>1</sup>H NMR (300 MHz, DMSO-*d*<sub>6</sub>) δ (ppm): 5.68(s, 2H), 7.16 (d, *J* = 8.4 Hz, 2H), 7.21 (s, 1H), 7.56-7.59 (m, 3H), 7.69 (d, *J* = 8.4 Hz, 3H), 8.24-8.29 (m, 2H);

<sup>13</sup>C NMR (75 MHz, DMSO-*d*<sub>6</sub>) δ (ppm): 86.9, 111.5, 115.6, 117.8, 127.3, 128.6, 129.5, 130.3, 131.6, 138.1, 154.9, 158.9, 160.8, 161.4.

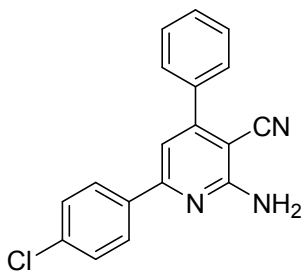

### 7. 2-Amino-4-phenyl-6-(4-bromophenyl)nicotinonitrile<sup>3</sup>

Yellow solid;

<sup>1</sup>H NMR (300 MHz, DMSO-*d*<sub>6</sub>) δ (ppm): 6.98 (s, 2H), 7.16 (s, 1H), 7.28 (d, *J* = 7.8 Hz, 2H), 7.60-7.65 (m, 3H), 7.79 (d, *J* = 7.8 Hz, 2H), 8.12-8.20 (m, 2H);

<sup>13</sup>C NMR (75 MHz, DMSO-*d*<sub>6</sub>) δ (ppm): 87.2, 108.9, 113.9, 117.8, 127.3, 129.1, 129.5, 130.3, 130.8, 138.0, 153.9, 159.4, 161.0, 162.1.

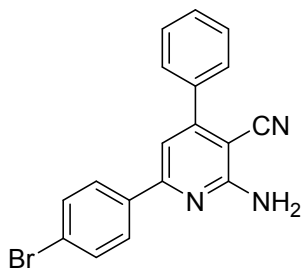

### 8. 2,3-Dihydro-2-phenylquinazolin-4(1H)-one<sup>4</sup>

White solid; M.P.: 224-226 °C;

<sup>1</sup>H NMR (400 MHz, DMSO-*d*<sub>6</sub>) δ (ppm): 5.73 (s, 1H), 6.65 (t, *J* = 7.6 Hz, 1H), 6.72 (d, *J* = 8 Hz, 1H), 7.09 (s, 1H), 7.20-7.24 (m, 1H), 7.30-7.39 (m, 3H), 7.47 (d, *J* = 8 Hz, 2H), 7.59 (d, *J* = 8 Hz, 1H), 8.27 (s, 1H);

<sup>13</sup>C NMR (100 MHz, DMSO-*d*<sub>6</sub>) δ (ppm): 67.1, 114.9, 115.5, 117.6, 127.4, 127.9, 128.8, 129.0, 133.8, 142.1, 148.4, 164.1.

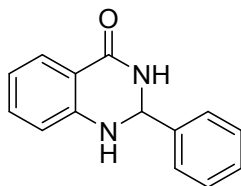

**9. 2,3-Dihydro-2-(4-methoxyphenyl)quinazolin-4(1H)-one<sup>4</sup>**

White solid; M.P.: 178-180 °C;

<sup>1</sup>H NMR (400 MHz, DMSO-*d*<sub>6</sub>) δ (ppm): 3.72 (s, 3H), 5.68 (s, 1H), 6.67 (t, *J* = 7.6 Hz, 1H), 6.71 (d, *J* = 8 Hz, 1H), 6.92 (d, *J* = 8.8 Hz, 2H), 6.98 (s, 1H), 7.21 (t, *J* = 8.4 Hz, 1H), 7.39 (d, *J* = 8.4 Hz, 2H), 7.58 (d, *J* = 8 Hz, 1H), 8.16 (s, 1H);

<sup>13</sup>C NMR (100 MHz, DMSO-*d*<sub>6</sub>) δ (ppm): 55.4, 66.8, 114.1, 114.9, 115.5, 117.6, 127.8, 128.7, 133.7, 134.0, 148.5, 159.9, 164.2;

IR (KBr) cm<sup>-1</sup>: 757, 1251, 1505, 1654, 2363, 2922, 3295, 3424.

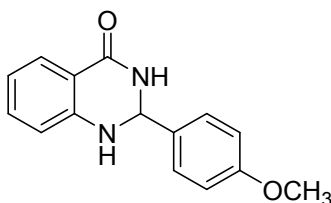

**10. 2-(4-Chlorophenyl)-2,3-dihydroquinazolin-4(1H)-one<sup>4</sup>**

White solid; M.P.: 201-203 °C;

<sup>1</sup>H NMR (400 MHz, DMSO-*d*<sub>6</sub>) δ (ppm): 5.90 (s, 1H), 6.67 (t, *J* = 7.6 Hz, 1H), 6.76 (d, *J* = 8 Hz, 1H), 7.24 (t, *J* = 7.6 Hz, 1H), 7.31 (s, 1H), 7.60 (d, *J* = 7.6 Hz, 1H), 7.73 (d, *J* = 8.8 Hz, 2H), 8.23 (d, *J* = 8.8 Hz, 2H), 8.51 (s, 1H);

<sup>13</sup>C NMR (100 MHz, DMSO-*d*<sub>6</sub>) δ (ppm): 65.8, 115.4, 118.0, 124.1, 126.4, 127.9, 128.5, 129.8, 134.1, 147.7, 149.8, 163.8.

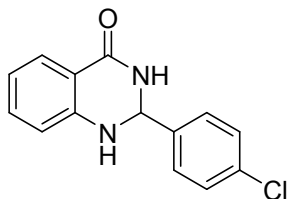

**11. 2-(4-Fluorophenyl)-2,3-dihydroquinazolin-4(1H)-one<sup>5</sup>**

White solid; M.P.: 202-204 °C;

<sup>1</sup>H NMR (400 MHz, DMSO-*d*<sub>6</sub>) δ (ppm): 5.73 (s, 1H), 6.67 (t, *J* = 7.6 Hz, 1H), 6.74 (d, *J* = 8 Hz, 1H), 7.09 (s, 1H), 7.18-7.25 (m, 2H), 7.51-7.54 (m, 2H), 7.61 (d, *J* = 7.6 Hz, 1H), 8.29 (s, 1H);

$^{13}\text{C}$  NMR (100 MHz,  $\text{DMSO-}d_6$ )  $\delta$  (ppm): 66.5, 115.0, 115.6 (d,  $J = 21.5$  Hz, 1C), 117.8, 127.9, 129.6 (d,  $J = 8.3$  Hz, 1C), 133.9, 138.3 (d,  $J = 2.2$  Hz, 1C), 148.3, 161.4, 163.8, 164.1;

$^{19}\text{F}$  NMR (376 MHz,  $\text{DMSO-}d_6$ )  $\delta$  (ppm): -113.76 (s, 1F).

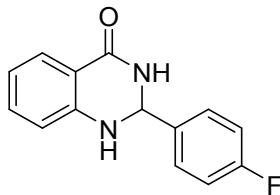

### 12. 2,3-Dihydro-2-*p*-tolylquinazolin-4(1*H*)-one<sup>4</sup>

White crystalline solid; M.P.: 232-233 °C;

$^1\text{H}$  NMR (300 MHz,  $\text{DMSO-}d_6$ )  $\delta$  (ppm): 2.39 (s, 3H), 5.78 (s, 1H), 5.87 (s, 1H), 6.67 (d,  $J = 8.1$  Hz, 1H), 6.90 (t,  $J = 7.5$  Hz, 1H), 7.26-7.42 (m, 5H), 7.95 (d,  $J = 7.8$  Hz, 1H);

$^{13}\text{C}$  NMR (75 MHz,  $\text{DMSO-}d_6$ )  $\delta$  (ppm): 21.4, 67.1, 114.8, 117.5, 124.4, 127.7, 127.9, 128.6, 129.5, 133.7, 137.8, 141.9, 148.3, 154.1, 164.1.

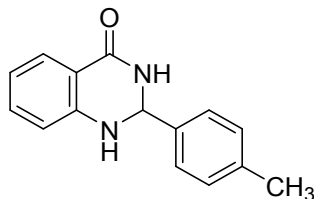

### 13. 2,3-Dihydro-2-(3-nitrophenyl)quinazolin-4(1*H*)-one<sup>4</sup>

Yellow solid; M.P.: 192-194 °C;

$^1\text{H}$  NMR (300 MHz,  $\text{DMSO-}d_6$ )  $\delta$  (ppm): 5.99 (s, 1H), 6.70 (d,  $J = 6.6$  Hz, 1H), 6.82 (d,  $J = 7.5$  Hz, 1H), 7.28 (d,  $J = 5.4$  Hz, 2H), 7.66 (t,  $J = 6.6$  Hz, 2H), 7.96 (d,  $J = 6.6$  Hz, 1H), 8.19 (s, 1H), 8.40 (s, 1H), 8.59 (s, 1H);

$^{13}\text{C}$  NMR (75 MHz,  $\text{DMSO-}d_6$ )  $\delta$  (ppm): 65.7, 115.1, 115.3, 118.0, 122.0, 123.7, 127.9, 130.4, 133.8, 134.1, 144.6, 147.6, 148.1, 164.0.

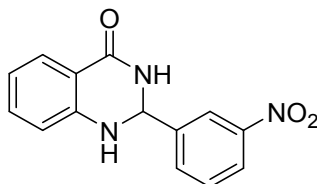

**14. 2,3-Dihydro-2-(4-hydroxy-3-methoxyphenyl)quinazolin-4(1H)-one<sup>5</sup>**

White solid; M.P.: 188-190 °C;

<sup>1</sup>H NMR (300 MHz, DMSO-*d*<sub>6</sub>) δ (ppm): 4.00 (s, 3H), 4.29 (s, 1H), 6.20 (s, 1H), 7.21-7.32 (m, 4H), 7.63 (s, 1H), 7.78 (d, *J* = 6.9 Hz, 1H), 8.16 (d, *J* = 7.2 Hz, 1H), 8.67 (s, 1H), 9.64 (s, 1H);

<sup>13</sup>C NMR (75 MHz, DMSO-*d*<sub>6</sub>) δ (ppm): 56.5, 67.8, 112.0, 115.4, 115.9, 115.9, 118.1, 120.6, 128.3, 132.9, 143.2, 147.8, 148.4, 149.1, 164.8.

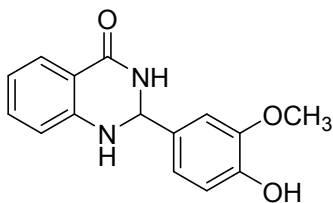

**15. 2,3-dihydro-2-(4-hydroxyphenyl)quinazolin-4(1H)-one<sup>4</sup>**

White crystalline solid; M.P.: 210-212 °C;

<sup>1</sup>H NMR (300 MHz, CDCl<sub>3</sub>) δ (ppm): 4.43 (s, 1H), 5.78 (s, 1H), 5.86 (s, 1H), 6.67 (d, *J* = 8.1 Hz, 1H), 6.90 (t, *J* = 7.5 Hz, 1H), 7.26-7.42 (m, 5H), 7.95 (d, *J* = 7.8 Hz, 1H), 8.33 (s, 1H);

<sup>13</sup>C NMR (75 MHz, DMSO-*d*<sub>6</sub>) δ (ppm): 66.8, 114.0, 114.8, 115.5, 117.5, 127.7, 128.6, 133.7, 133.9, 148.4 159.8, 164.1.

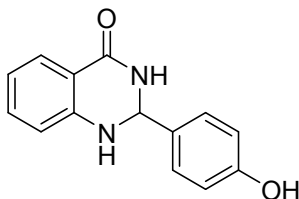

**16. 2,3-Dihydro-2-(2-hydroxyphenyl)quinazolin-4(1H)-one<sup>4</sup>**

White solid; M.P.: 220-221 °C;

<sup>1</sup>H NMR (300 MHz, CDCl<sub>3</sub>) δ (ppm): 4.61 (s, 1H), 5.92 (s, 1H), 5.98 (s, 1H), 6.54-6.72 (m, 4H), 6.77 (d, *J* = 7.8 Hz, 1H), 7.02 (d, *J* = 7.5 Hz, 1H), 7.11-7.33 (m, 2H), 8.91 (s, 1H);

<sup>13</sup>C NMR (75 MHz, DMSO-*d*<sub>6</sub>) δ (ppm): 69.9, 128.4, 128.5, 128.6, 129.0, 132.1, 132.7, 133.9, 135.8, 140.5, 156.7, 166.6.

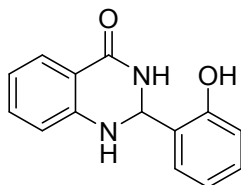



### 17. 2,3-Dihydro-2-(thiophen-2-yl)quinazolin-4(1H)-one<sup>4</sup>

White solid; M.P.: 213-215 °C;

<sup>1</sup>H NMR (300 MHz, DMSO-*d*<sub>6</sub>) δ (ppm): 6.01 (s, 1H), 6.69 (t, *J* = 7.6 Hz, 1H), 6.75 (d, *J* = 8 Hz, 1H), 6.96 (dd, *J* = 5.2 Hz & 3.6 Hz, 1H), 7.11 (s, 1H), 7.22-7.29 (m, 2H), 7.43 (dd, *J* = 4.8 Hz & 0.8 Hz, 1H), 7.61 (d, *J* = 7.6 Hz, 1H), 8.44 (s, 1H);

<sup>13</sup>C NMR (75 MHz, DMSO-*d*<sub>6</sub>) δ (ppm): 63.1, 115.2, 115.6, 118.0, 126.2, 126.4, 127.0, 127.8, 133.9, 146.9, 147.7, 163.6.

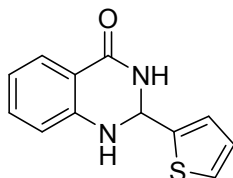

### 18. 2-(Furan-2-yl)-2,3-dihydroquinazolin-4(1H)-one<sup>5</sup>

White crystalline solid; M.P.: 166-167 °C;

<sup>1</sup>H NMR (300 MHz, DMSO-*d*<sub>6</sub>) δ (ppm): 5.76 (s, 1H), 6.72 (s, 1H), 7.25-7.49 (m, 3H), 7.61 (s, 1H), 7.73 (d, *J* = 6.9 Hz, 2H), 8.24 (d, *J* = 6.9 Hz, 2H);

<sup>13</sup>C NMR (75 MHz, DMSO-*d*<sub>6</sub>) δ (ppm): 60.0, 112.9, 113.9, 121.0, 126.5, 126.7, 127.6, 134.9, 143.4, 145.4, 146.2, 149.2.

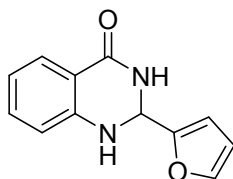

### 19. 2,3-Dihydro-2-(pyridin-3-yl)quinazolin-4(1H)-one<sup>5</sup>

Pale yellow solid; M.P.: 219-221 °C;

<sup>1</sup>H NMR (400 MHz, DMSO-*d*<sub>6</sub>) δ (ppm): 5.85 (s, 1H), 7.69 (t, *J* = 7.6 Hz, 1H), 6.75 (d, *J* = 8 Hz, 1H), 7.17 (s, 1H), 7.25 (t, *J* = 7.2 Hz, 1H), 7.40 (dd, *J* = 7.6 Hz & 4.8 Hz, 1H), 7.62 (d, *J* = 7.2 Hz, 1H), 7.88 (d, *J* = 8 Hz, 1H), 8.39 (s, 1H), 8.53 (d, *J* = 4 Hz, 1H), 8.66 (s, 1H);

<sup>13</sup>C NMR (100 MHz, DMSO-*d*<sub>6</sub>) δ (ppm): 65.2, 115.1, 115.5, 118.0, 124.1, 127.9, 134.0, 135.2, 137.3, 148.2, 148.9, 150.2, 164.1.

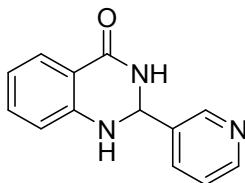

**20. 2-Hexyl-2,3-dihydroquinazolin-4(1H)-one<sup>5</sup>**

White solid; M.P.: 156-158 °C;

<sup>1</sup>H NMR (300 MHz, DMSO-*d*<sub>6</sub>) δ (ppm): 0.85 (d, 3H), 1.26-1.60 (m, 10H), 1.60 (q, 2H), 6.54 (s, 1H), 6.69 (q, *J* = 8.4 Hz, 2H), 7.57 (d, *J* = 7.5 Hz, 1H), 7.22 (t, 1H), 7.85(s, 1H);

<sup>13</sup>C NMR (75 MHz, DMSO-*d*<sub>6</sub>) δ (ppm): 14.3, 22.4, 23.6, 29.0, 31.6, 35.5, 64.9, 114.8, 115.4, 117.3, 127.8, 133.4, 148.9, 164.3;

IR (KBr) cm<sup>-1</sup>: 751, 1502, 1642, 2361, 2856, 2926, 3210, 3324.

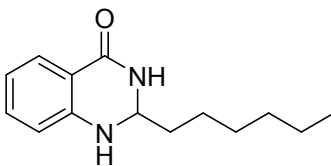

**21. 2,3-Dihydro-2-styrylquinazolin-4(1H)-one<sup>5</sup>**

White solid; M.P.: 224-226 °C;

<sup>13</sup>C NMR (75 MHz, DMSO-*d*<sub>6</sub>) δ (ppm): 66.2, 115.0, 115.3, 117.6, 118.1, 127.1, 127.8, 128.5, 128.8, 129.1, 132.0, 133.6, 136.2, 148.2, 163.8.

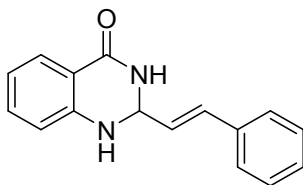

**22. 2,3-Dihydro-2-(naphthalen-3-yl)quinazolin-4(1H)-one<sup>5</sup>**

White solid; M.P.: 225-227 °C;

<sup>1</sup>H NMR (300 MHz, DMSO-*d*<sub>6</sub>) δ (ppm): 5.95 (s, 1H), 6.61 (s, 1H), 6.85 (t, *J* = 7.5 Hz, 1H), 6.78 (d, *J* = 8.1 Hz, 1H), 7.26 (q, *J* = 7.5 Hz, 2H), 7.53 (q, *J* = 6.3 Hz, 2H), 7.68 (q, *J* = 8.4 Hz, 2H), 7.91-7.97 (m, 4H), 8.38 (s, 1H);

<sup>13</sup>C NMR (75 MHz, DMSO-*d*<sub>6</sub>) δ (ppm): 67.3, 114.9, 115.4, 117.6, 125.2, 126.3, 126.8, 127.8, 128.0, 128.4, 128.5, 132.9, 133.4, 133.8, 139.3, 148.3, 164.1.

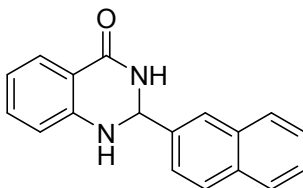

**23. 2-(4-(Dimethylamino)phenyl)-2,3-dihydroquinazolin-4(1H)-one**

White solid; M.P.: 224-227 °C;

$^1\text{H}$  NMR (300 MHz,  $\text{DMSO-}d_6$ )  $\delta$  (ppm): 2.86 (s, 6H), 5.62 (s, 1H), 6.64 (t,  $J = 7.6$  Hz, 1H), 6.78 (t,  $J = 7.6$  Hz, 3H), 6.90 (s, 1H), 7.21 (t,  $J = 7.5$  Hz, 1H), 7.28 (d,  $J = 8.8$  Hz, 2H), 7.59 (d,  $J = 7.6$  Hz, 1H), 8.06 (s, 1H);

$^{13}\text{C}$  NMR (75 MHz,  $\text{DMSO-}d_6$ )  $\delta$  (ppm): 67.2, 112.4, 114.9, 115.6, 117.4, 127.8, 128.2, 129.1, 133.6, 148.7, 151.2, 164.3.

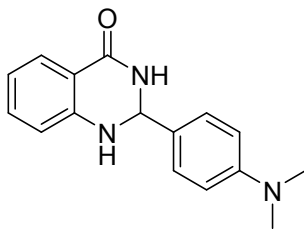

**24. 2-(4-Methoxybenzylidene)malononitrile**

Yellow solid; M.P.: 110-112 °C;

$^1\text{H}$  NMR (400 MHz,  $\text{CDCl}_3$ )  $\delta$  (ppm): 3.9 (s, 3H), 7.00 (d,  $J = 8.8$  Hz, 2H), 7.64 (s, 1H), 7.90 (d,  $J = 8.8$  Hz, 2H);

$^{13}\text{C}$  NMR (100 MHz,  $\text{CDCl}_3$ )  $\delta$  (ppm): 55.9, 78.5, 113.4, 114.5, 115.2, 124.1, 133.5, 159.0, 164.9.

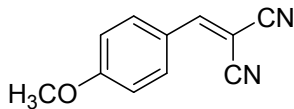

**25. 2-Aminobenzamide**

Pale white; M.P.: 108-110 °C;

$^1\text{H}$  NMR (400 MHz,  $\text{DMSO-}d_6$ )  $\delta$  (ppm): 7.74 (s, br, 1H), 7.54-7.52 (m, 1H), 7.14-7.11 (m, 1H), 7.07 (brs, 1H), 6.68 (d,  $J = 8.1$  Hz, 1H), 6.55 (brs, 2H), 6.48 (t,  $J = 7.5$  Hz, 1H);

$^{13}\text{C}$  NMR (100 MHz,  $\text{DMSO-}d_6$ )  $\delta$  (ppm): 114.2, 115.0, 117.0, 129.3, 132.5, 150.7, 171.9.

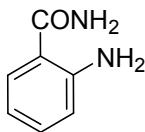

## V. FT-IR spectra of 2-amino-4,6-disubstituted nicotinitriles

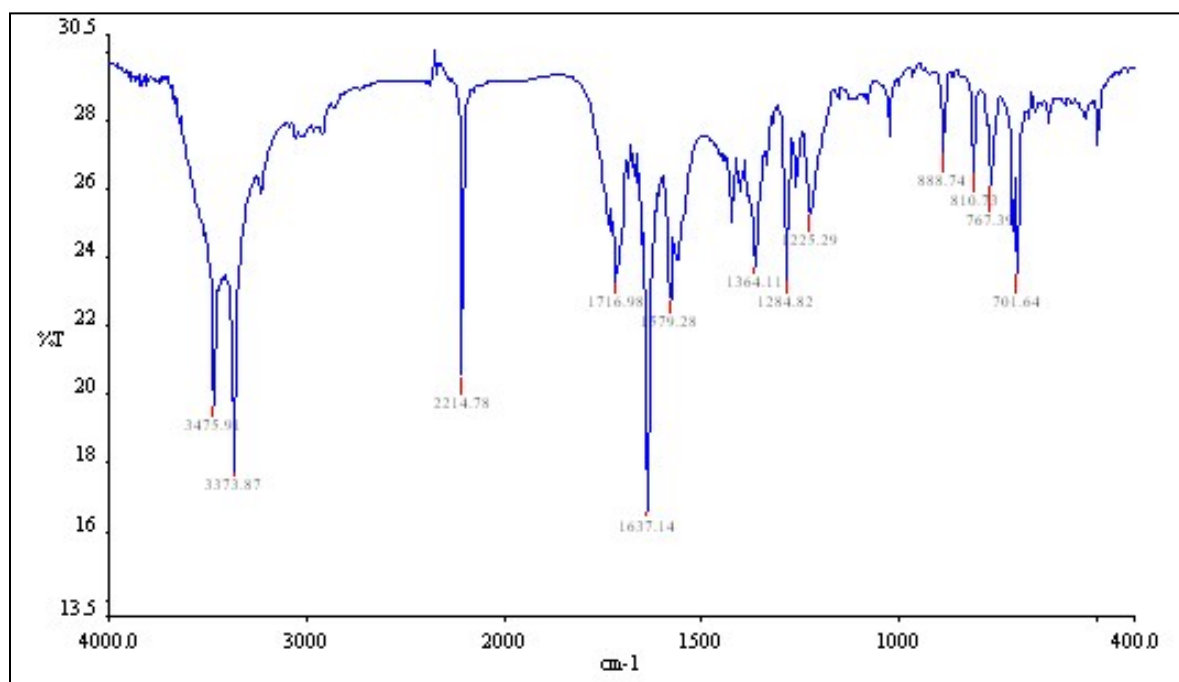

## VI. FT-IR spectra of 2,3-dihydro-2-(4-methoxyphenyl)quinazolin-4(1H)-one

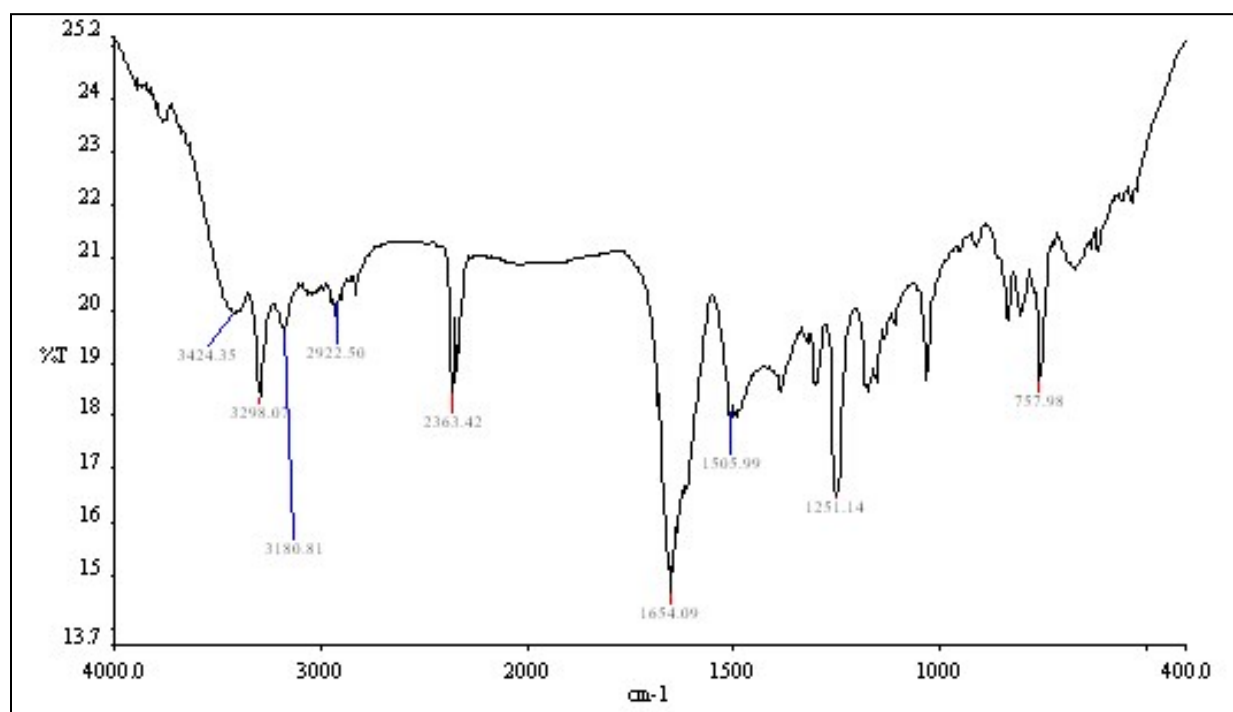

## VII. FT-IR spectra of 2-hexyl-2,3-dihydroquinazolin-4(1H)-one

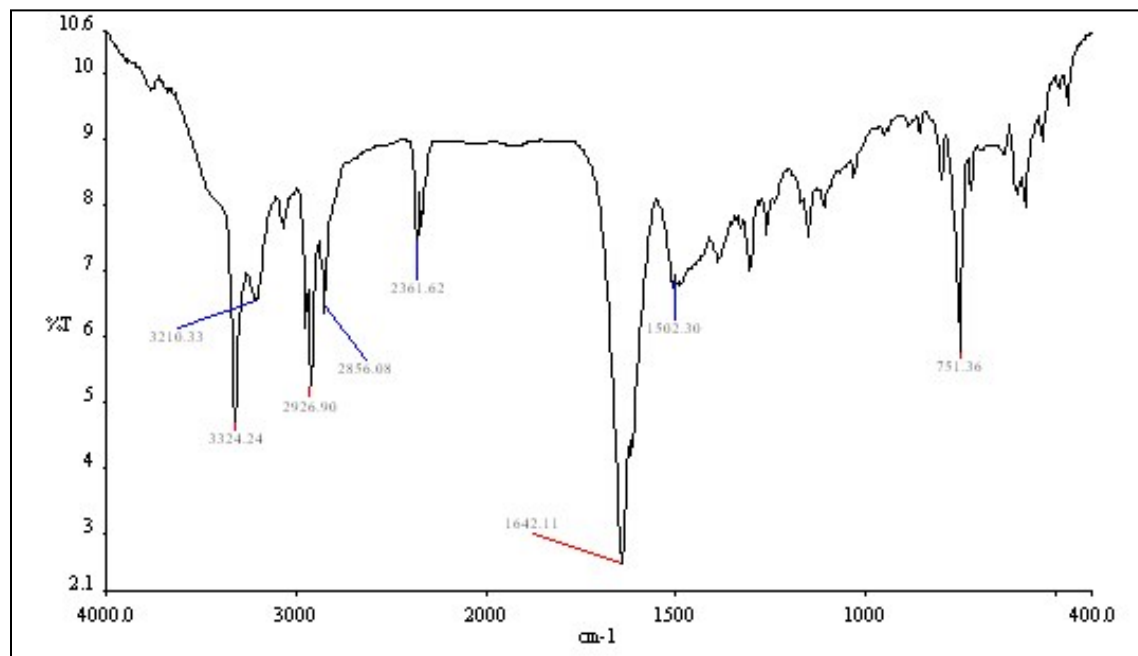

### VIII. Scanned copies of $^{13}\text{C}$ , $^1\text{H}$ and $^{19}\text{F}$ NMR spectra of derivatives

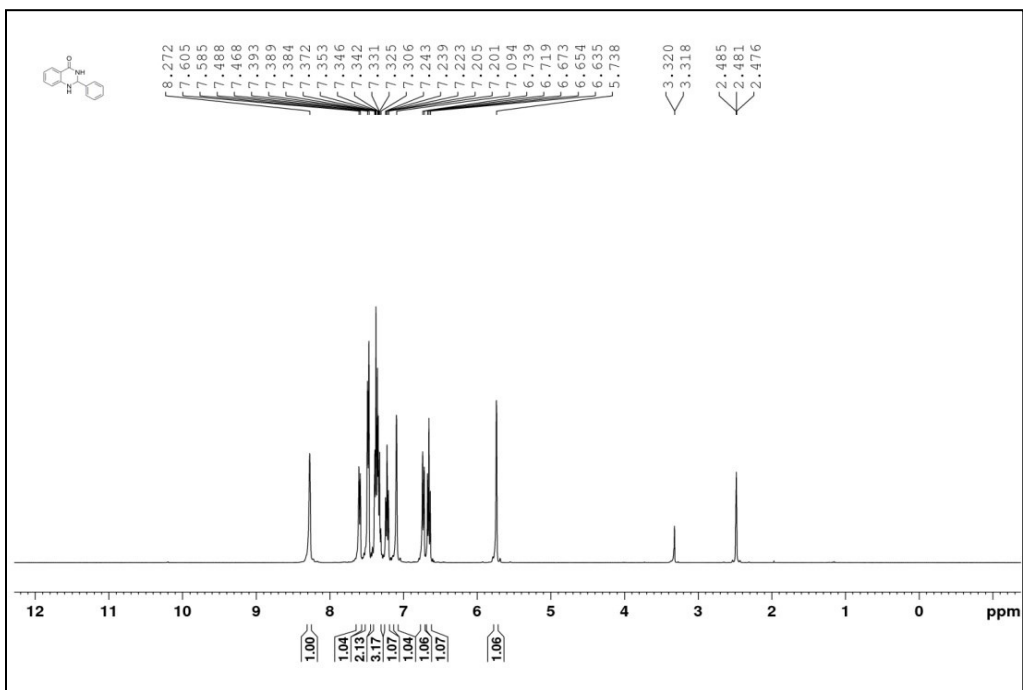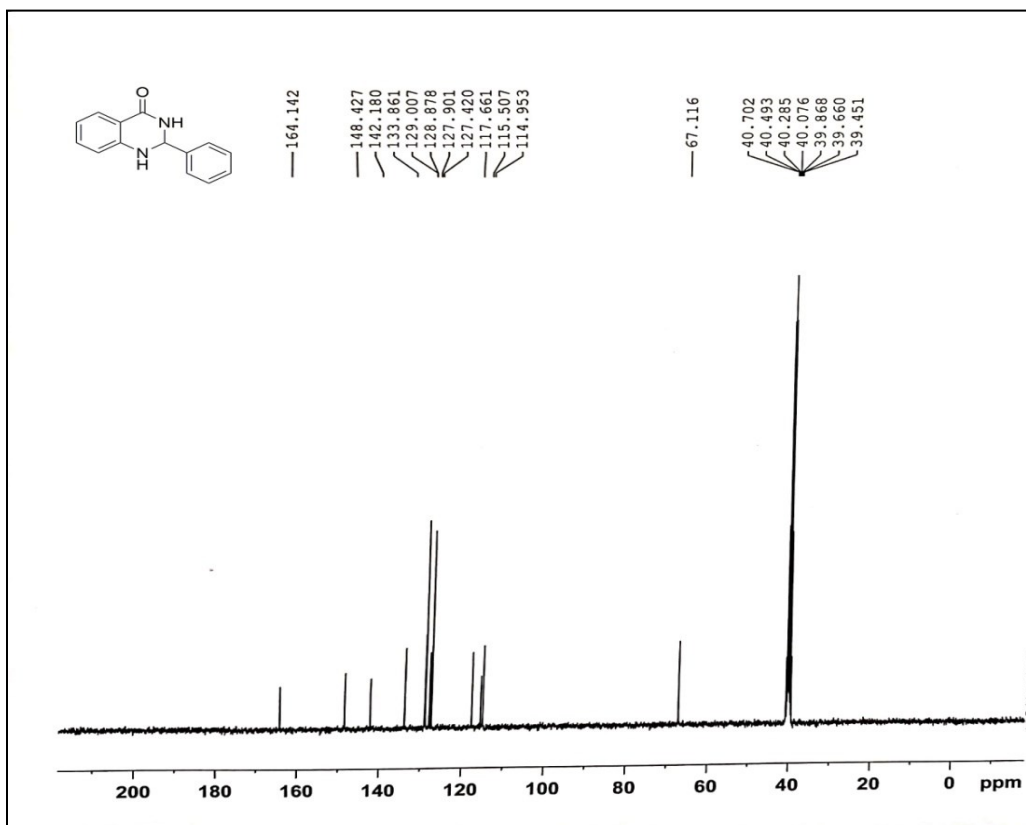

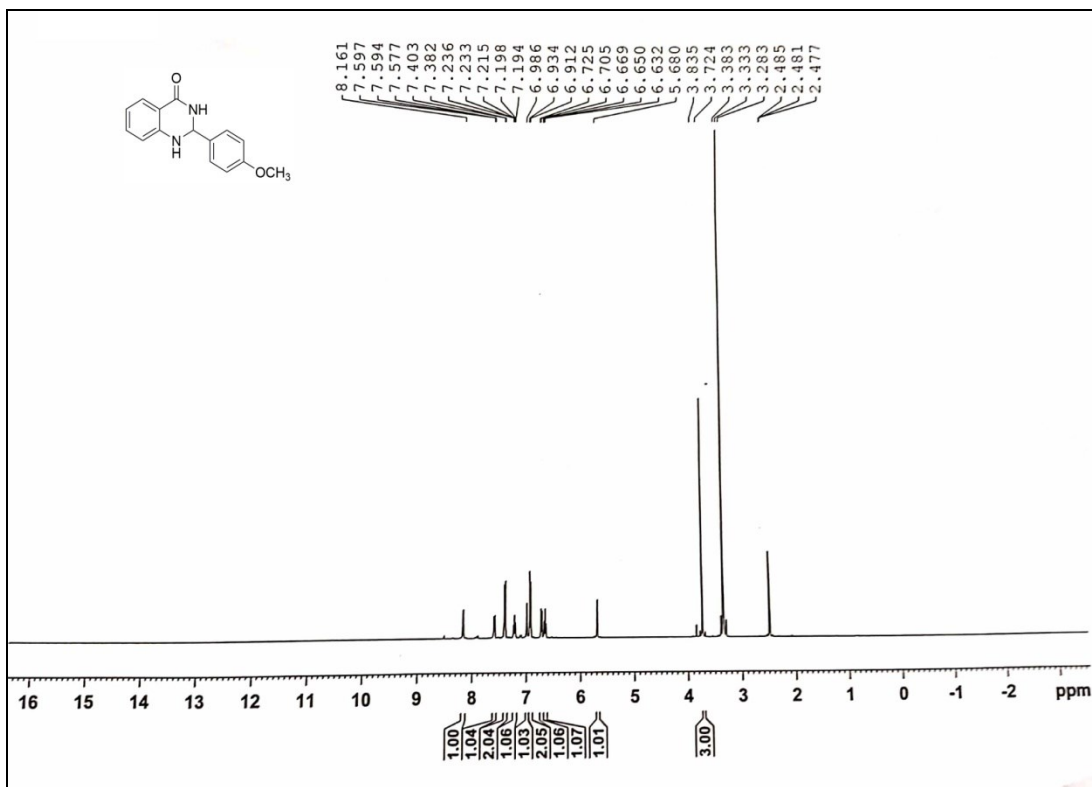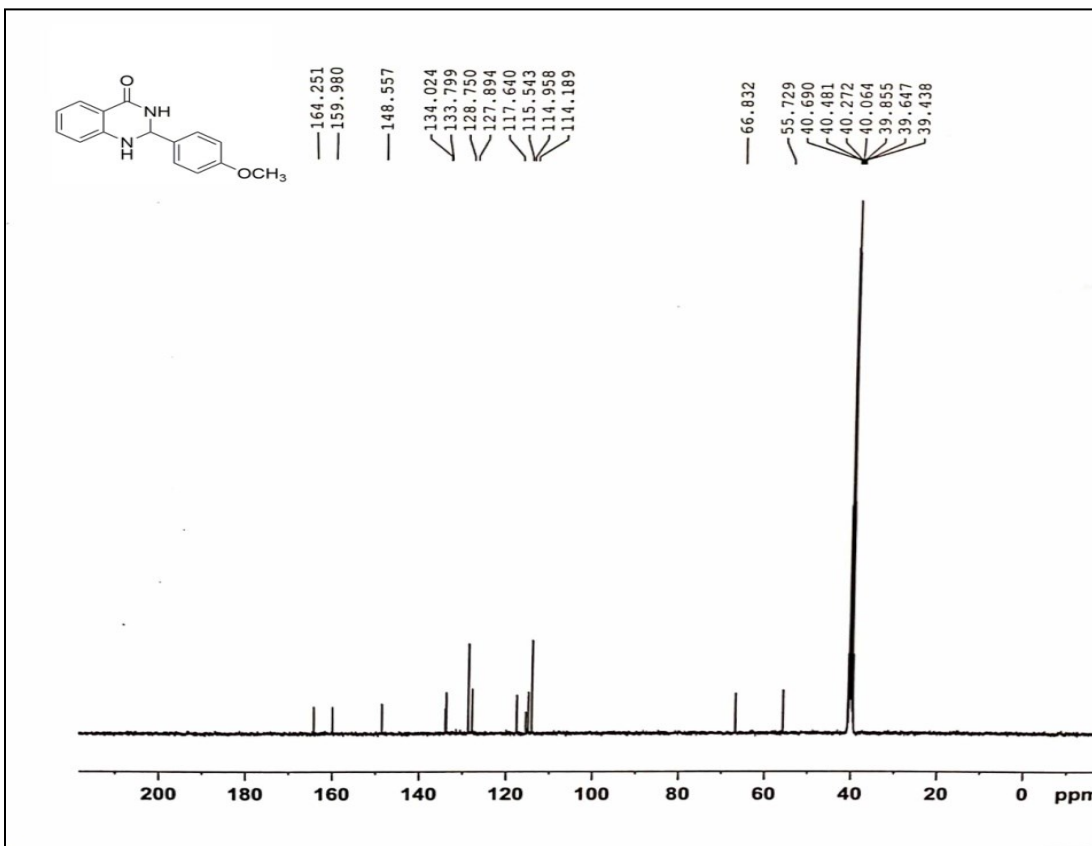

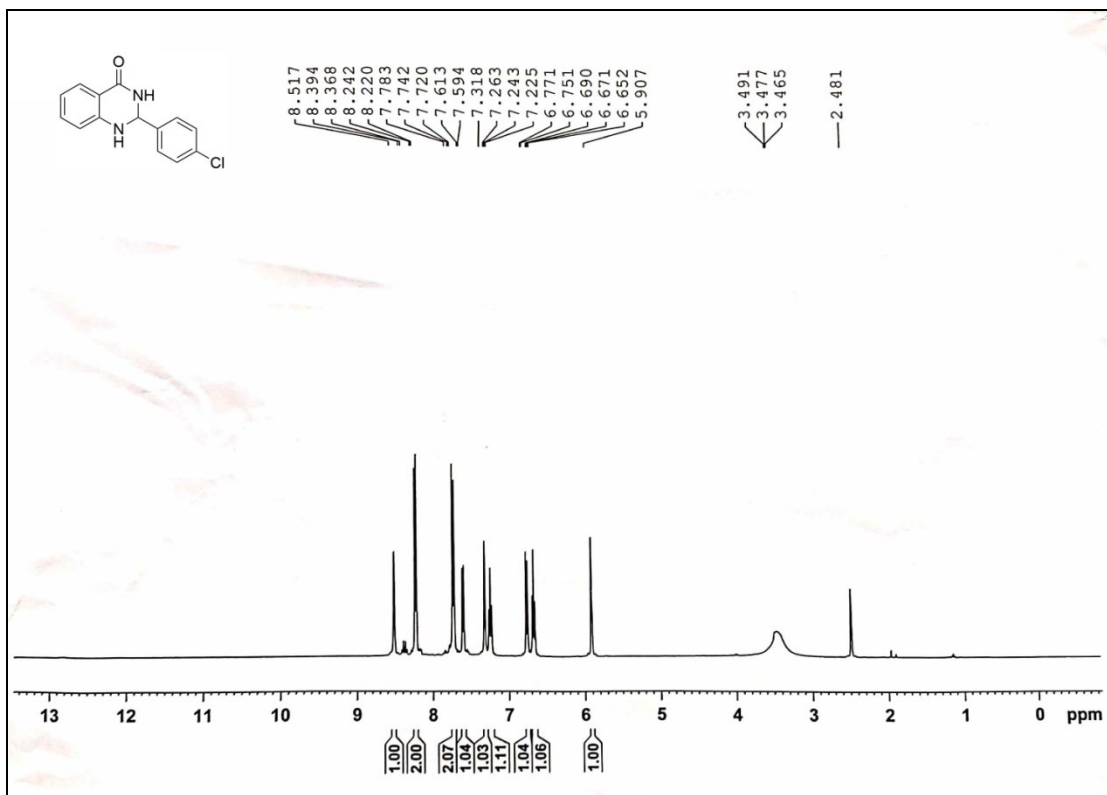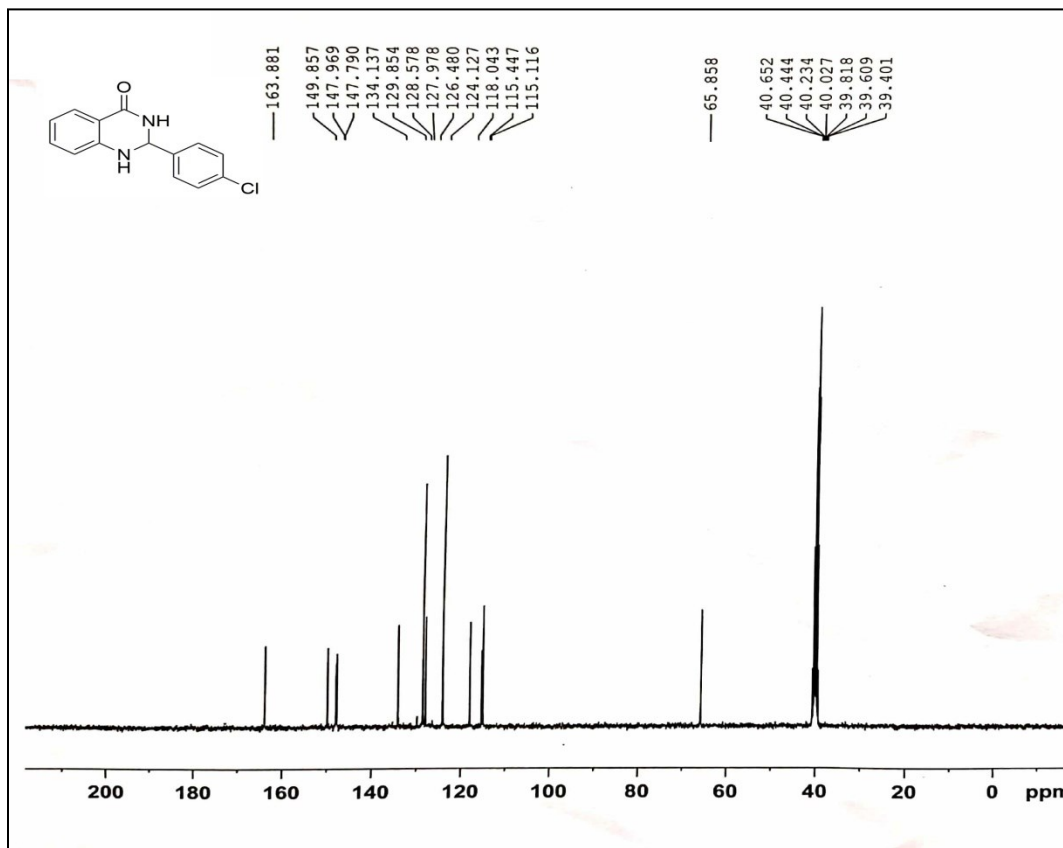



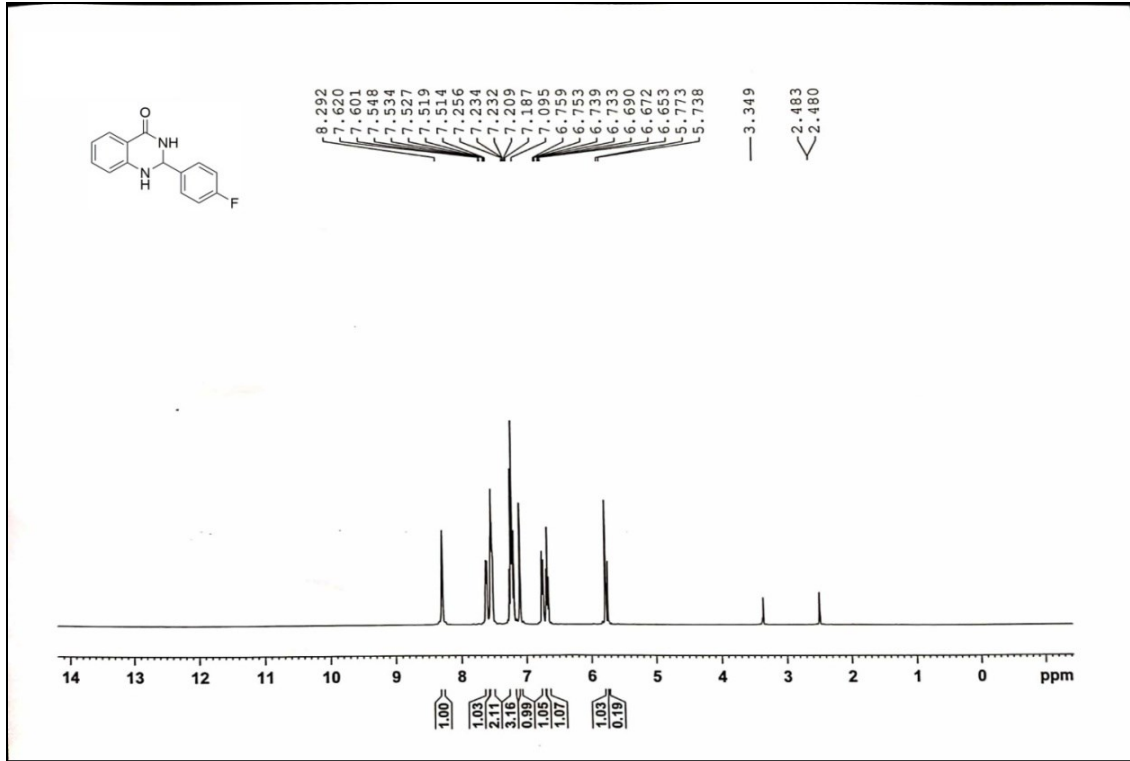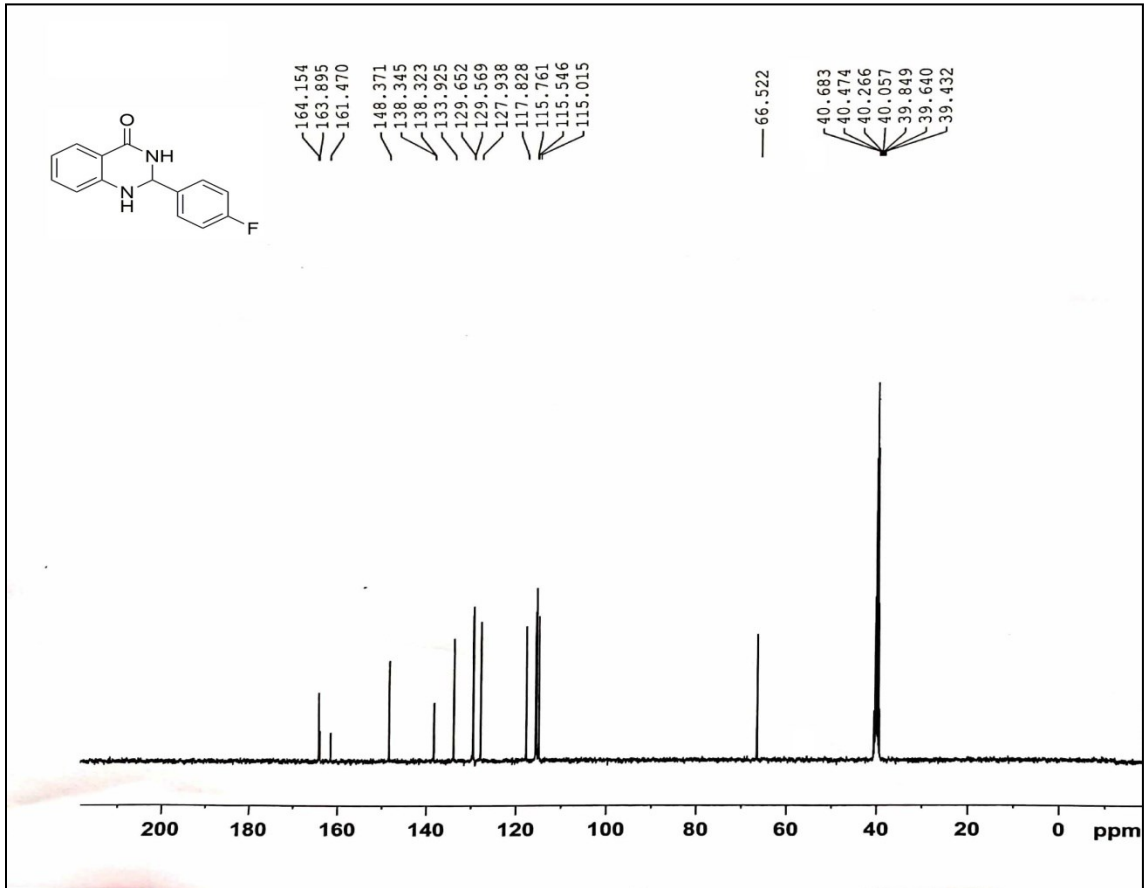

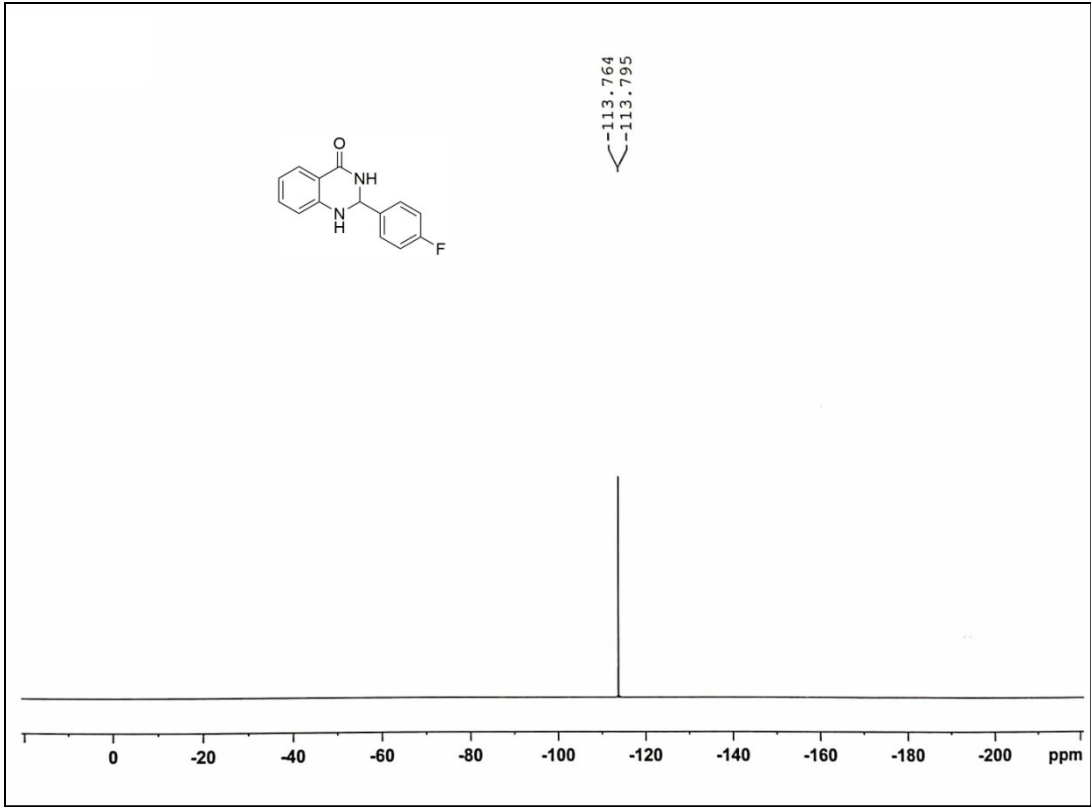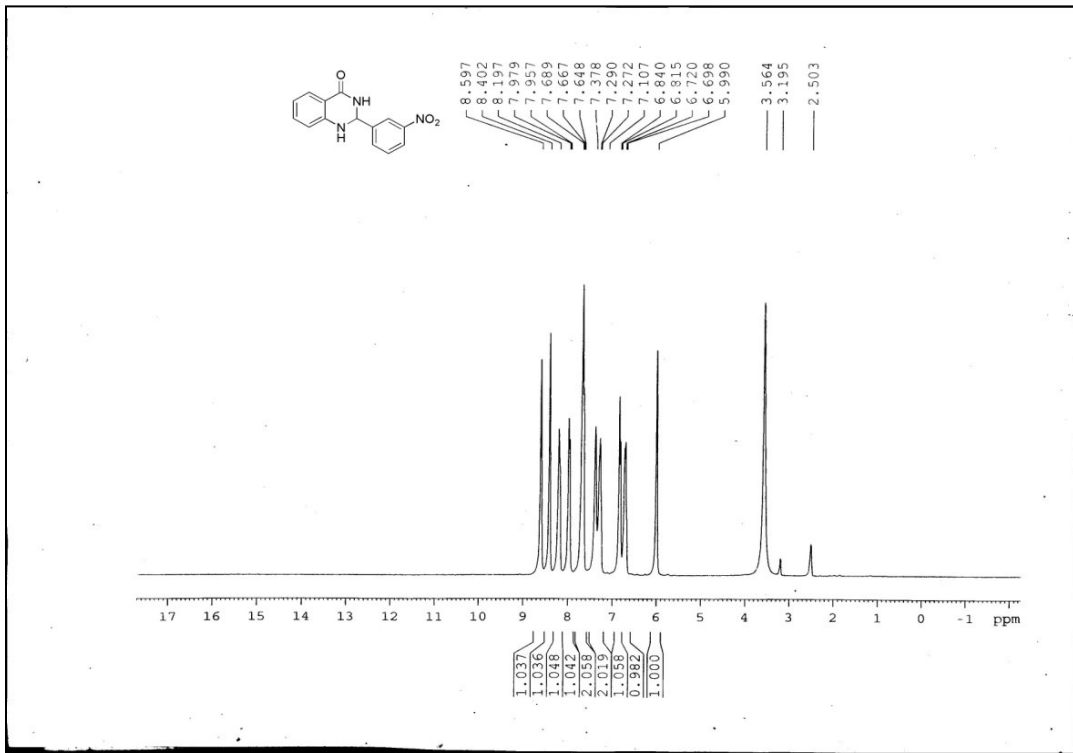

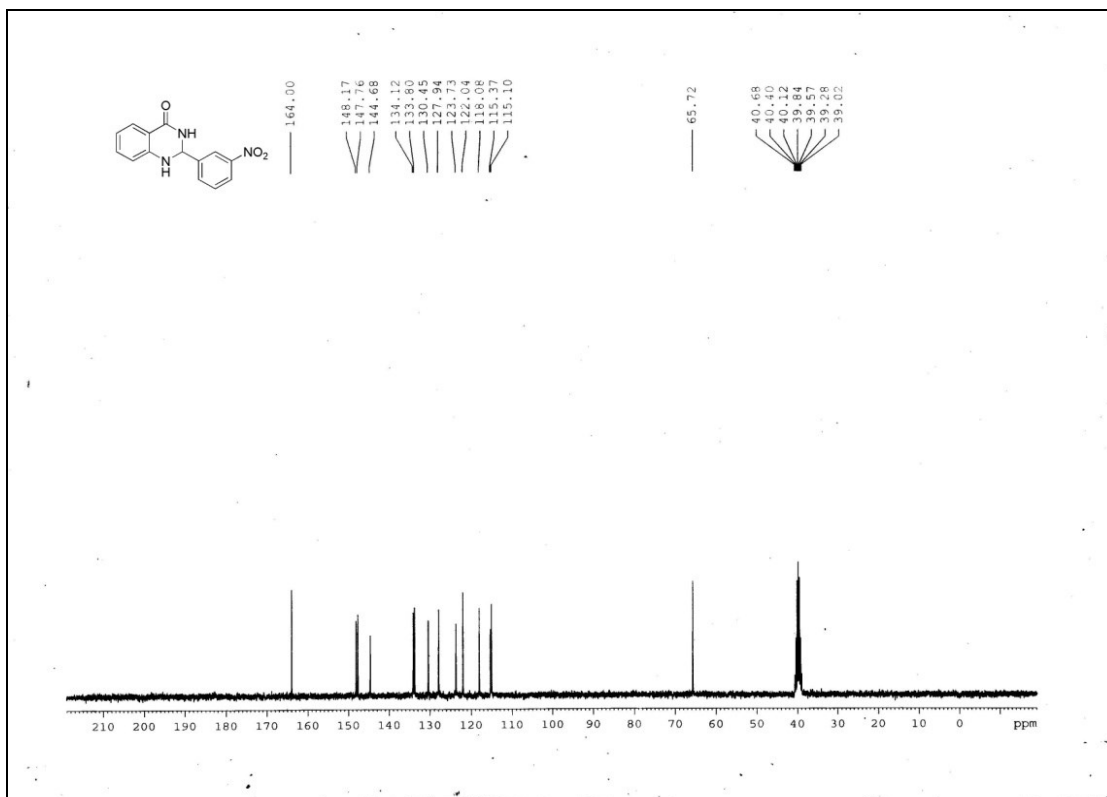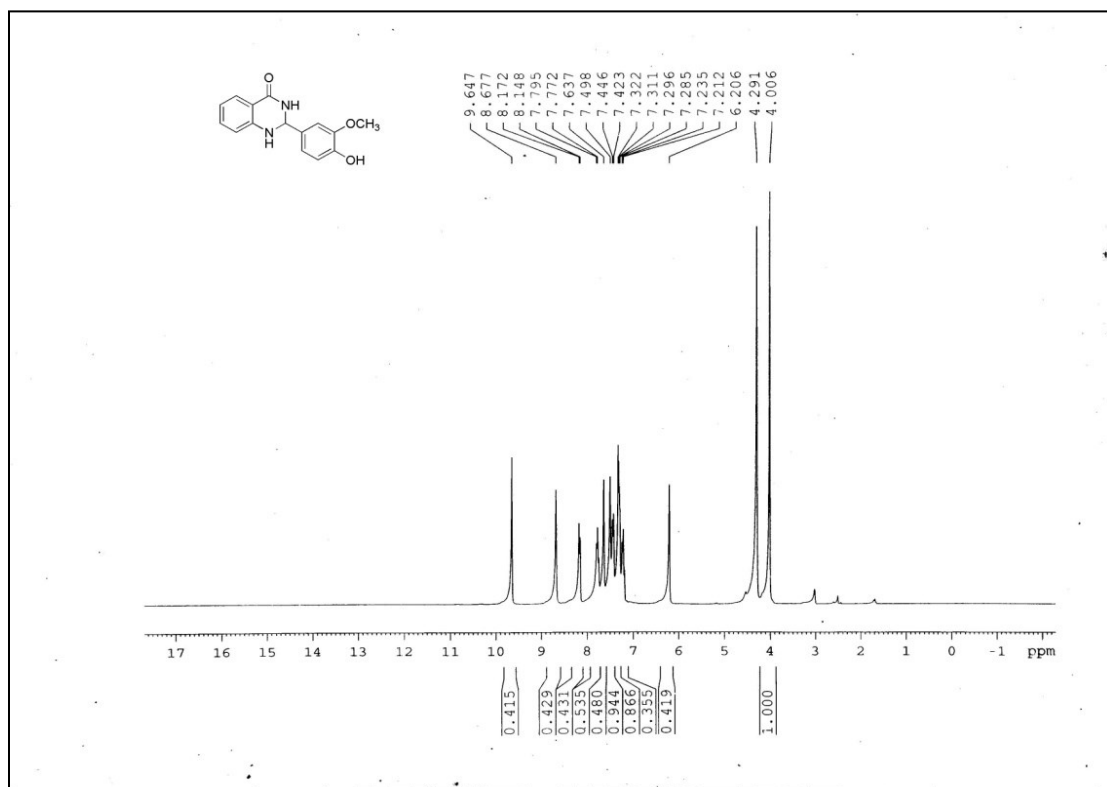

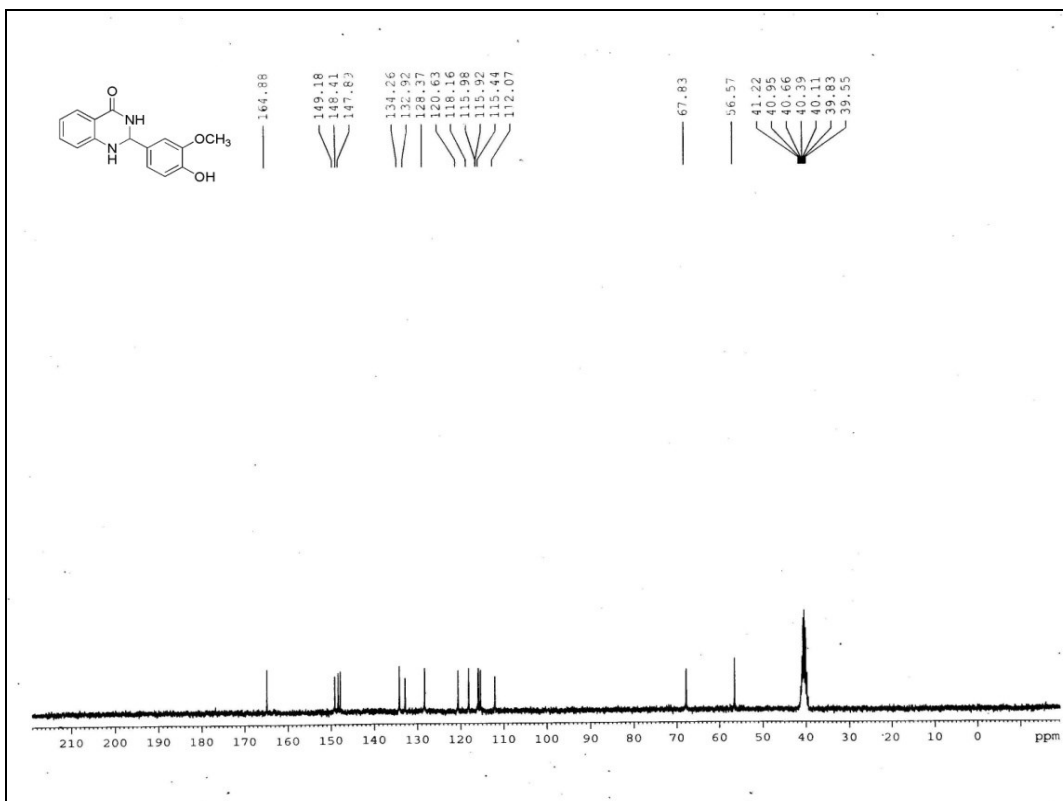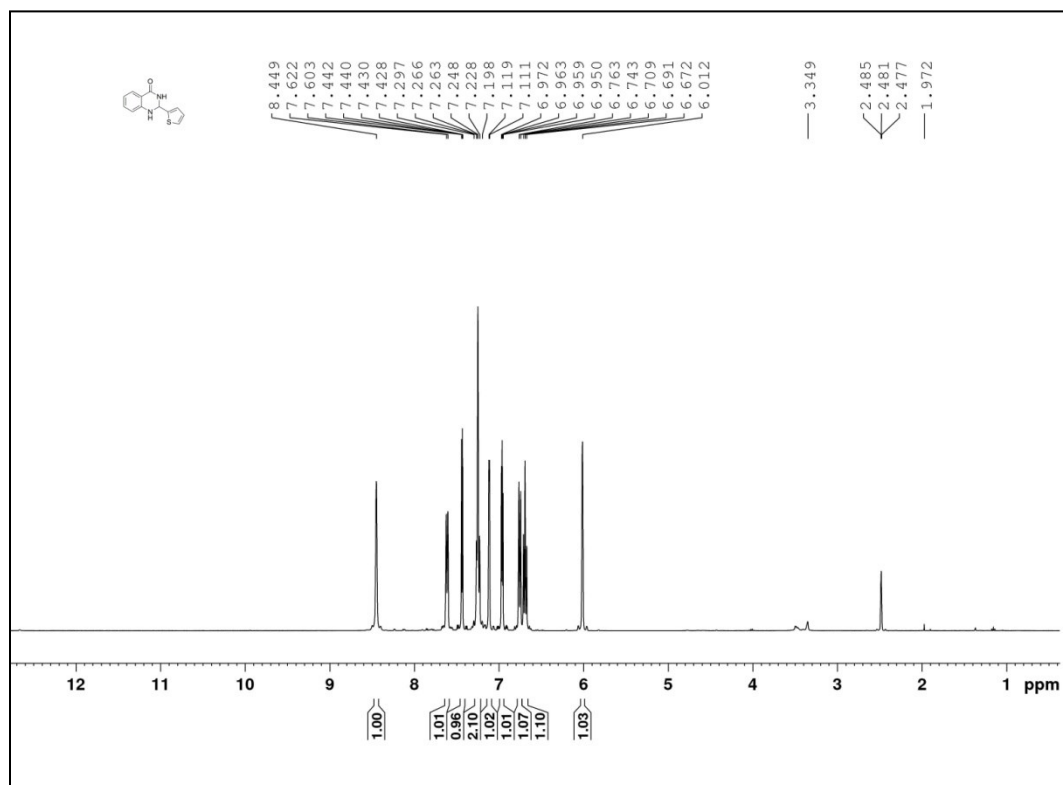

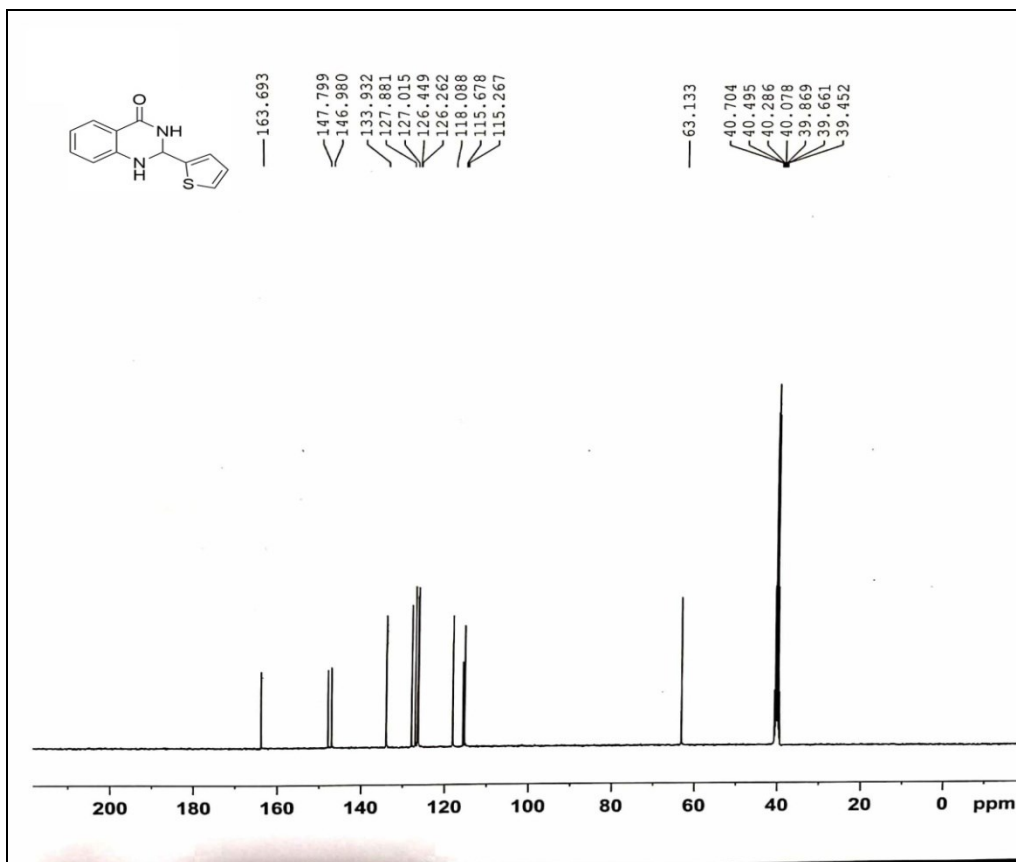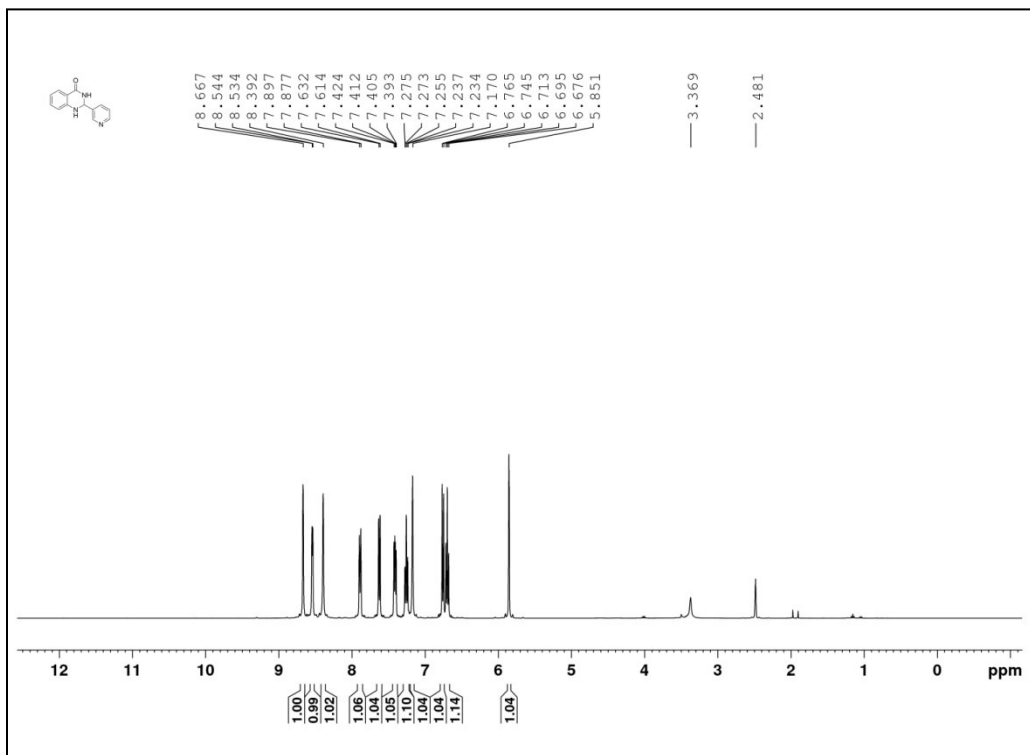

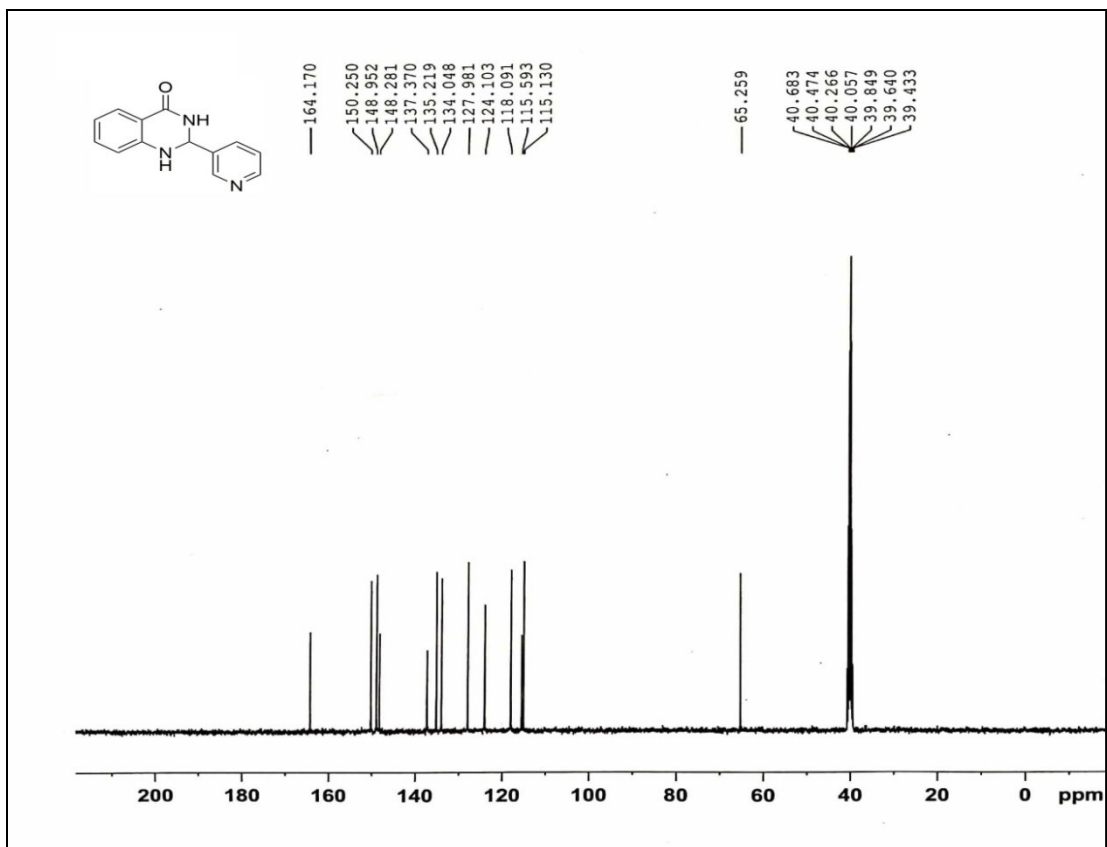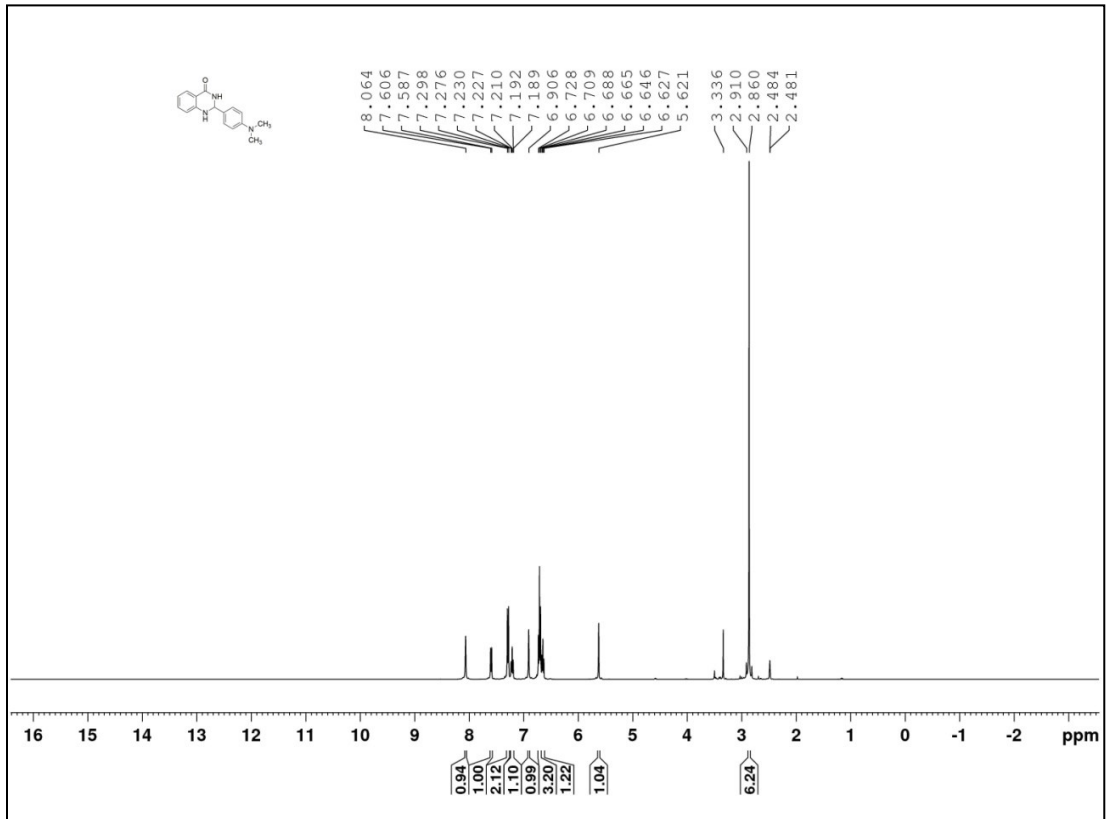

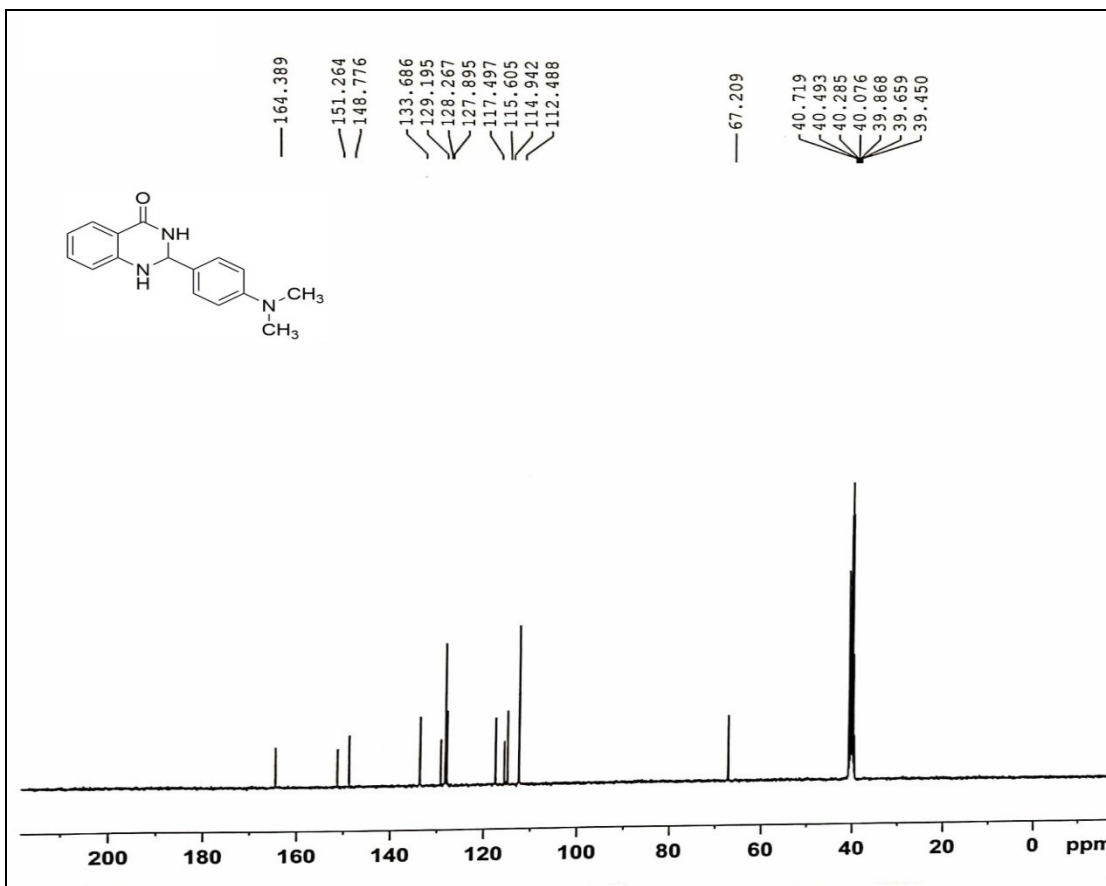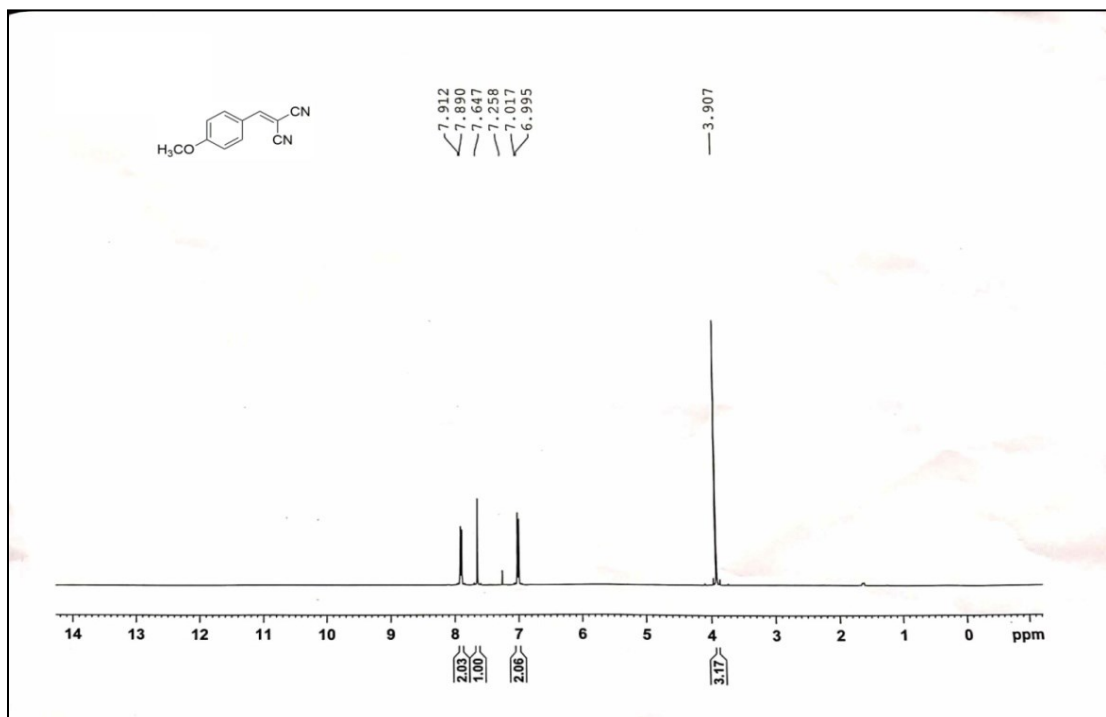

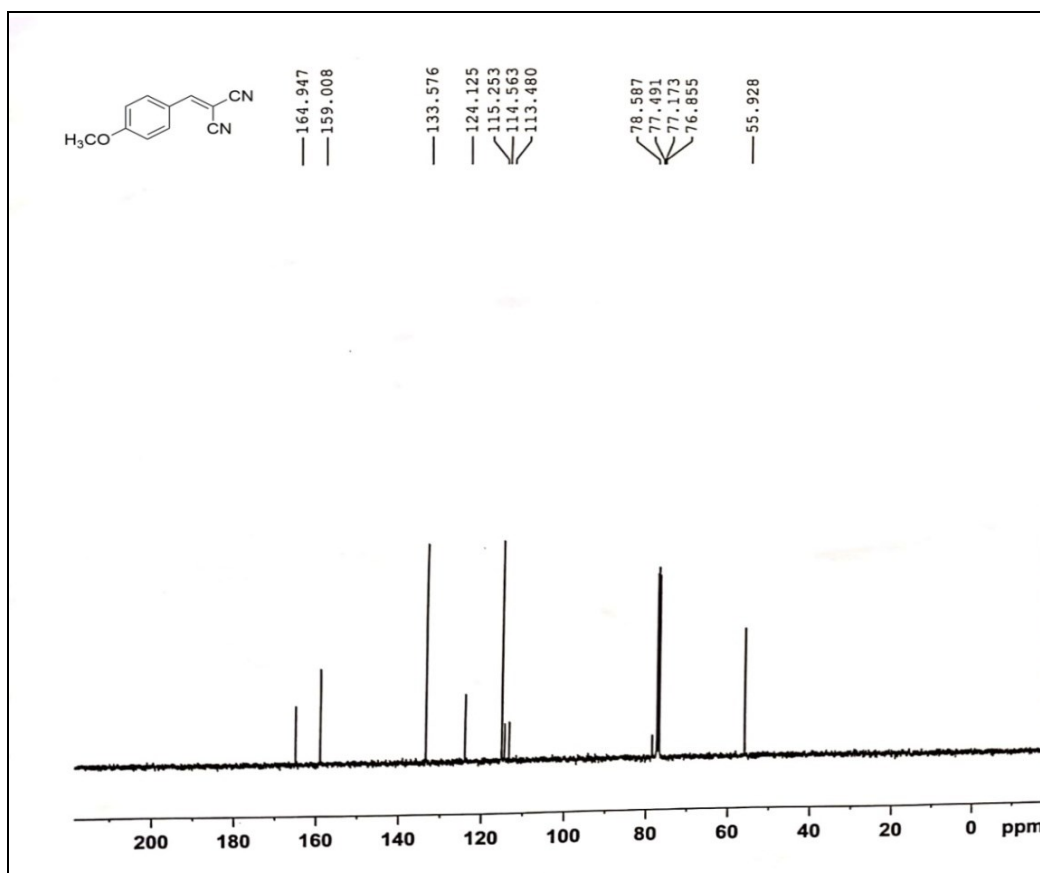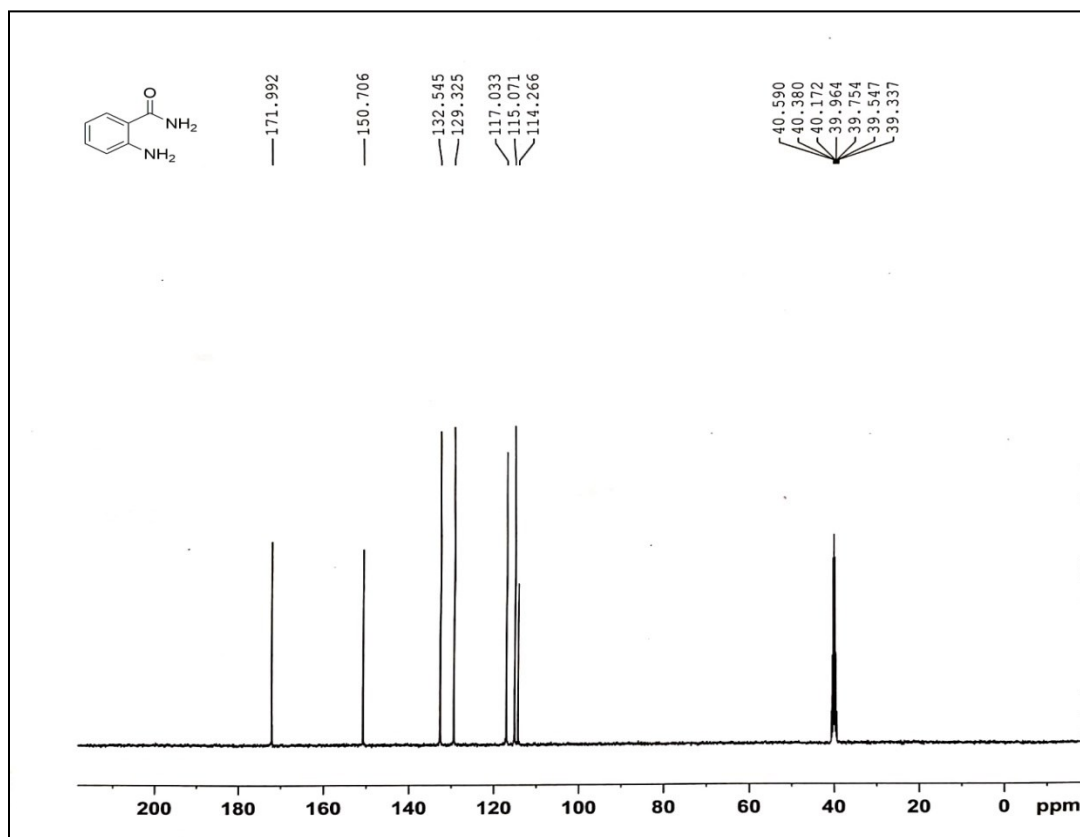



## IX. References

1. D. Khalili, *Tetrahedron Lett.*, 2016, **57**, 1721-1723.
2. J. Tang, L. Wang, Y. Yao, L. Zhang and W. Wang, *Tetrahedron Lett.*, 2011, **52**, 509-511.
3. S. S. Mansoor, K. Aswin, K. Logaiya, P. N. Sudhan and S. Malik, *Res. Chem. Intermed.*, 2014, **40**, 871-885.
4. N. Kausar, I. Roy, D. Chattopadhyay and A. R. Das, *RSC Adv.*, 2016, **6**, 22320-22330.
5. G. C. Pariyar, B. Mitra, S. Mukherjee and P. Ghosh, *ChemistrySelect*, 2020, **5**, 104-108.
6. S. M. Galani, A. K. Giri, S. C. Ghosh and A. B. Panda, *ChemistrySelect*, 2018, **3**, 9414-9421
